# Supplementary material
Source: MDPI journal article supplement (https://www.mdpi.com/1424-2818/14/11/1001)
Supplement: s1 [file s1]

Table S1. GenBank accession numbers of analyzed strains. New sequences are indicated in bold.

| <b>Species</b>              | <b>Strain</b>   | <b>SSU</b> | <b>ITS2+LSU</b> | <b><i>psbA</i></b> | <b>Country, habitat (if present) and source</b>           |
|-----------------------------|-----------------|------------|-----------------|--------------------|-----------------------------------------------------------|
| <i>Cryptomonas borealis</i> | M1083           | AM051188   | AJ566160        | None               | Germany (Hoef-Emden & Melkonian, 2003)                    |
| <i>C. cattiensis</i>        | VN 876          | MT000714   | MT000713        | MN990426           | Vietnam, grassy wetland (Martynenko <i>et al.</i> , 2020) |
| <i>C. commutata</i>         | M0739           | AJ420697   | AJ566165        | None               | Austria, bog (Hoef-Emden, 2007)                           |
| <i>C. commutata</i>         | M1975           | AM901364   | AM396380        | None               | Germany, moat (Hoef-Emden, 2007)                          |
| <i>C. curvata</i>           | CCAC 0080       | AM051189   | AJ566148        | None               | Germany (Hoef-Emden & Melkonian, 2003)                    |
| <i>C. curvata</i>           | CNUCRY64        | KF907376   | KF907329        | KF907463           | Korea (Choi <i>et al.</i> , 2013)                         |
| <i>C. curvata</i>           | NNSura3D        | MZ268233   | MZ305470        | MZ353616           | Russia (Gusev <i>et al.</i> , 2022)                       |
| <i>C. erosa</i>             | M0741           | AM051201   | AJ566163        | None               | Austria, bog (Hoef-Emden, 2007)                           |
| <i>C. erosa</i>             | SYKOA Cr-010-19 | MW487989   | MW432538        | MW430149           | Russia, sphagnum bog (Martynenko <i>et al.</i> , 2022)    |
| <i>C. furtiva</i>           | R 207           | OK484510   | OK491443        | OK493498           | Russia (Gusev <i>et al.</i> , 2022)                       |
| <i>C. furtiva</i>           | R 208           | OK484511   | OK491444        | OK493499           | Russia (Gusev <i>et al.</i> , 2022)                       |
| <i>C. gyropyrenoidosa</i>   | M1079           | AJ421149   | AJ566154        | None               | Germany (Hoef-Emden & Melkonian, 2003)                    |
| <i>C. gyropyrenoidosa</i>   | CNUCRY146       | KF907380   | KF907333        | KF907467           | Korea (Choi <i>et al.</i> , 2013)                         |
| <i>C. gyropyrenoidosa</i>   | R 247           | MZ268225   | MZ305462        | MZ353609           | Russia (Gusev <i>et al.</i> , 2022)                       |
| <i>C. indica</i>            | India 11        | MW430772   | MW430992        | MW430127           | India, reservoir (Gusev <i>et al.</i> , 2021)             |
| <i>C. kisselevii</i>        | NN 3            | OK484497   | OK491429        | OK493487           | Russia (Gusev <i>et al.</i> , 2022)                       |
| <i>C. kisselevii</i>        | NN 21           | OK484496   | OK491430        | OK493486           | Russia (Gusev <i>et al.</i> , 2022)                       |
| <i>C. loricata</i>          | M2088           | None       | AJ715456        | None               | Germany, temporary puddle (Hoef-Emden, 2005)              |
| <i>C. loricata</i>          | R 242           | MZ268224   | MZ305461        | MZ353608           | Russia (Gusev <i>et al.</i> , 2022)                       |
| <i>C. lundii</i>            | M0850           | AM051190   | AJ566161        | None               | Germany (Hoef-Emden & Melkonian, 2003)                    |
| <i>C. lundii</i>            | R 179           | MT216858   | MT216865        | MZ353626           | Russia (Gusev <i>et al.</i> , 2022)                       |
| <i>C. macilenta</i>         | SYKOA Cr-009-19 | MW487990   | MW432539        | MW430150           | Russia, sphagnum bog (Martynenko <i>et al.</i> , 2022)    |
| <i>C. marssonii</i>         | CCAC 0086       | AM051191   | AJ566155        | None               | Germany (Hoef-Emden & Melkonian, 2003)                    |
| <i>C. marssonii</i>         | CCAC 0103       | AM051192   | AJ715444        | None               | Germany (Hoef-Emden & Melkonian, 2003)                    |
| <i>C. matvienkoae</i>       | R 246           | OK484506   | OK491439        | OK493494           | Russia (Gusev <i>et al.</i> , 2022)                       |
| <i>C. meshchyorana</i>      | R 171           | OK484507   | OK491442        | OK493495           | Russia (Gusev <i>et al.</i> , 2022)                       |
| <i>C. obovata</i>           | Saenae080611D   | None       | KF907336        | KF907470           | Korea (Choi <i>et al.</i> , 2013)                         |
| <i>C. obovata</i>           | NN 17           | MZ268226   | MZ305463        | MZ353610           | Russia (Gusev <i>et al.</i> , 2022)                       |

|                            |                 |          |          |          |                                                                         |
|----------------------------|-----------------|----------|----------|----------|-------------------------------------------------------------------------|
| <i>C. obovoidea</i>        | CNUCRY76        | KF907383 | KF907337 | KF907471 | Korea (Choi <i>et al.</i> , 2013)                                       |
| <i>C. obovoidea</i>        | Songgock032611  | KF907384 | KF907338 | KF907472 | Korea (Choi <i>et al.</i> , 2013)                                       |
| <i>C. obovoidea</i>        | R 105           | MZ268240 | MZ305477 | MZ353623 | Russia (Gusev <i>et al.</i> , 2022)                                     |
| <i>C. ovata</i>            | CCAC 0064       | AM051193 | AJ566153 | None     | Germany (Hoef-Emden & Melkonian, 2003)                                  |
| <i>C. ovata</i>            | R 168           | MZ268235 | MZ305472 | MZ353618 | Russia (Gusev <i>et al.</i> , 2022)                                     |
| <i>C. paludosa</i>         | R 186           | OK484495 | OK491428 | OK493485 | Russia (Gusev <i>et al.</i> , 2022)                                     |
| <i>C. paludosa</i>         | Okgeum121809C   | None     | KF907358 | KF907492 | Korea (Choi <i>et al.</i> , 2013)                                       |
| <i>C. paramaecium</i>      | CCAC 0056       | AJ007276 | AJ566158 | None     | Canada, Warren Lake (Hoef-Emden & Melkonian, 2003)                      |
| <i>C. paramaecium</i>      | CCAP 977/1      | AM051194 | AJ715445 | None     | United Kingdom, garden pond (Hoef-Emden <i>et al.</i> , 2005)           |
| <i>C. parmana</i>          | SYKOA Cr-001-19 | MW430993 | MW432537 | MW430152 | Russia, sphagnum bog (Martynenko <i>et al.</i> , 2022)                  |
| <i>C. parmana</i>          | SYKOA Cr-008-19 | MW487991 | MW432536 | MW430151 | Russia, sphagnum bog (Martynenko <i>et al.</i> , 2022)                  |
| <i>C. phaseolus</i>        | CNUCRY5         | KF907389 | KF907343 | KF907477 | Korea (Choi <i>et al.</i> , 2013)                                       |
| <i>C. phaseolus</i>        | Gakgae043010    | KF907391 | KF907345 | KF907479 | Korea (Choi <i>et al.</i> , 2013)                                       |
| <i>C. phaseolus</i>        | R 100           | MZ268239 | MZ305476 | MZ353622 | Russia (Gusev <i>et al.</i> , 2022)                                     |
| <i>C. platyuris</i>        | R 244           | OK484499 | OK491431 | None     | Russia (Gusev <i>et al.</i> , 2022)                                     |
| <i>C. platyuris</i>        | NN 8            | OK484498 | OK491432 | None     | Russia (Gusev <i>et al.</i> , 2022)                                     |
| <i>C. pyrenoidifera</i>    | CNUCRY134       | KF907394 | KF907348 | KF907482 | Korea (Choi <i>et al.</i> , 2013)                                       |
| <i>C. pyrenoidifera</i>    | M1077           | AM051197 | AJ566144 | None     | Germany (Hoef-Emden & Melkonian, 2003)                                  |
| <i>C. pyrenoidifera</i>    | NNSura5A        | MZ268234 | MZ305471 | MZ353617 | Russia (Gusev <i>et al.</i> , 2022)                                     |
| <i>C. skujae</i>           | NN 31           | OK484502 | OK491435 | OK493490 | Russia (Gusev <i>et al.</i> , 2022)                                     |
| <i>C. skujae</i>           | R 243           | OK484501 | OK491433 | OK493489 | Russia (Gusev <i>et al.</i> , 2022)                                     |
| <i>C. tetrapyrenoidosa</i> | Deokam032610    | KF907407 | KF907363 | KF907497 | Korea (Choi <i>et al.</i> , 2013)                                       |
| <i>C. tetrapyrenoidosa</i> | M1092           | AM051198 | AJ566146 | None     | Germany (Hoef-Emden & Melkonian, 2003; Hoef-Emden <i>et al.</i> , 2005) |
| <i>C. tetrapyrenoidosa</i> | R 178           | MZ268236 | MZ305473 | MZ353619 | Russia (Gusev <i>et al.</i> , 2022)                                     |
| <i>C. uralensis</i>        | UR 168          | MN509779 | MN509781 | None     | Russia (Martynenko <i>et al.</i> , 2020)                                |
| <i>C. uralensis</i>        | R 241           | MZ268242 | MZ305479 | MZ353625 | Russia (Gusev <i>et al.</i> , 2022)                                     |
| <i>C. ursina</i>           | NN 11           | OK484504 | OK491438 | OK493492 | Russia (Gusev <i>et al.</i> , 2022)                                     |
| <i>C. ursina</i>           | R 172           | OK484505 | OK491437 | OK493493 | Russia (Gusev <i>et al.</i> , 2022)                                     |
| <i>C. vietnamica</i>       | VN873           | MT216859 | MT216866 | None     | Vietnam, old irrigation pond (Gusev <i>et al.</i> , 2020)               |

|                              |                       |                 |                 |                 |                                                                                            |
|------------------------------|-----------------------|-----------------|-----------------|-----------------|--------------------------------------------------------------------------------------------|
| <i>C. vietnamica</i>         | VN877                 | MT232229        | MT232231        | None            | Vietnam, stream (Gusev <i>et al.</i> , 2020)                                               |
| <i>Cryptomonas</i> sp.       | CNUCRY75              | KF907401        | KF907355        | KF907489        | Korea (Choi <i>et al.</i> , 2013)                                                          |
| <i>Cryptomonas</i> sp.       | Dumo2                 | KF907403        | KF907357        | KF907491        | Korea (Choi <i>et al.</i> , 2013)                                                          |
| <i>Cryptomonas</i> sp.       | M1634                 | AM901361        | AJ715457        | None            | Denmark (Hoef-Emden, 2007)                                                                 |
| <i>Cryptomonas</i> sp.       | M2807                 | None            | AM396397        | None            | Germany, pond in a bog (Hoef-Emden, 2007)                                                  |
| <i>Cryptomonas</i> sp.       | M2504                 | None            | AM396396        | None            | Germany (Hoef-Emden, 2007)                                                                 |
| <i>Cryptomonas</i> sp.       | SAG 977-2f            | None            | AJ715458        | None            | South Africa (Hoef-Emden, 2007)                                                            |
| <i>Cryptomonas</i> sp.       | Yeonra43011B          | KF907404        | KF907360        | KF907494        | Korea (Choi <i>et al.</i> , 2013)                                                          |
| <i>Cryptomonas</i> sp.       | R 107                 | OK484509        | OK491441        | OK493497        | Russia (Gusev <i>et al.</i> , 2022)                                                        |
| <i>Cryptomonas</i> sp.       | M2195                 | None            | AM396393        | None            | Germany (Hoef-Emden, 2007)                                                                 |
| <i>Cryptomonas</i> sp.       | R 182                 | OK484508        | OK491440        | OK493496        | Russia (Gusev <i>et al.</i> , 2022)                                                        |
| <b><i>C. tropica</i></b>     | <b>Vp 376</b>         | <b>OP456093</b> | <b>OP456095</b> | <b>OP440446</b> | <b>Vietnam, soil (this research)</b>                                                       |
| <b><i>C. tropica</i></b>     | <b>Vp 1145</b>        | <b>OP456092</b> | <b>OP456094</b> | <b>OP440445</b> | <b>Vietnam, soil (this research)</b>                                                       |
| <i>Rhodomonas</i> sp.        | C5/6                  | MW812240        | MW812242        | MW822044        | Vietnam (Martynenko <i>et al.</i> , 2022)                                                  |
| <i>Rhodomonas</i> sp.        | E12/23                | MW812241        | MW812243        | MW822045        | Vietnam (Martynenko <i>et al.</i> , 2022)                                                  |
| <i>Guillardia theta</i>      | Unknown               | X57162          | AF289037        | NC_000926       | Unknown (Douglas <i>et al.</i> , 1990; Ben Ali <i>et al.</i> , 2001; Douglas, Penny, 1999) |
| <i>Hemiselmis andersenii</i> | CCMP 441/<br>CCMP 644 | AM901350        | AM901319        | MG646580        | USA, North Atlantic, Gulf of Mexico (Hoef-Emden, 2008; Yang <i>et al.</i> , 2020)          |

---
